# Supplementary material for: A novel Eu3+ activated Ca3Zn3Te2O12 tellurate red phosphor for white LEDs with high color stability and color purity
Source: Royal Society of Chemistry journal article supplement (doi:10.1039/d4nj01281j), 2024-01-01
Supplement: d4nj01281j1.pdf [file d4nj01281j1.pdf]

## Supporting Information

### **A novel Eu<sup>3+</sup> activated Ca<sub>3</sub>Zn<sub>3</sub>Te<sub>2</sub>O<sub>12</sub> tellurate red phosphor for white LEDs with high color stability and color purity**

Feiyan Xie<sup>a\*</sup>, Junqiang Gu<sup>b</sup>, Dekang Xu<sup>a</sup>, Qiancheng Xiong<sup>a</sup>, Jinyu

Yang<sup>a</sup>, Xiangjian Ou<sup>a</sup>, Dawei Wen<sup>c\*</sup>

<sup>a</sup>School of Chemistry and Materials Engineering, Huizhou University, Huizhou 516007, P.R. China

<sup>b</sup>College of Chemistry and Chemical Engineering, Jiangxi Normal University, Nanchang 330022, P.R. China

<sup>c</sup>School of Applied Physics and Materials, Wuyi University, Jiangmen, Guangdong 529020 China

\* Corresponding author

Email: xfy@hzu.edu.cn (F. Xie)

ontaii@163.com (D. Wen)

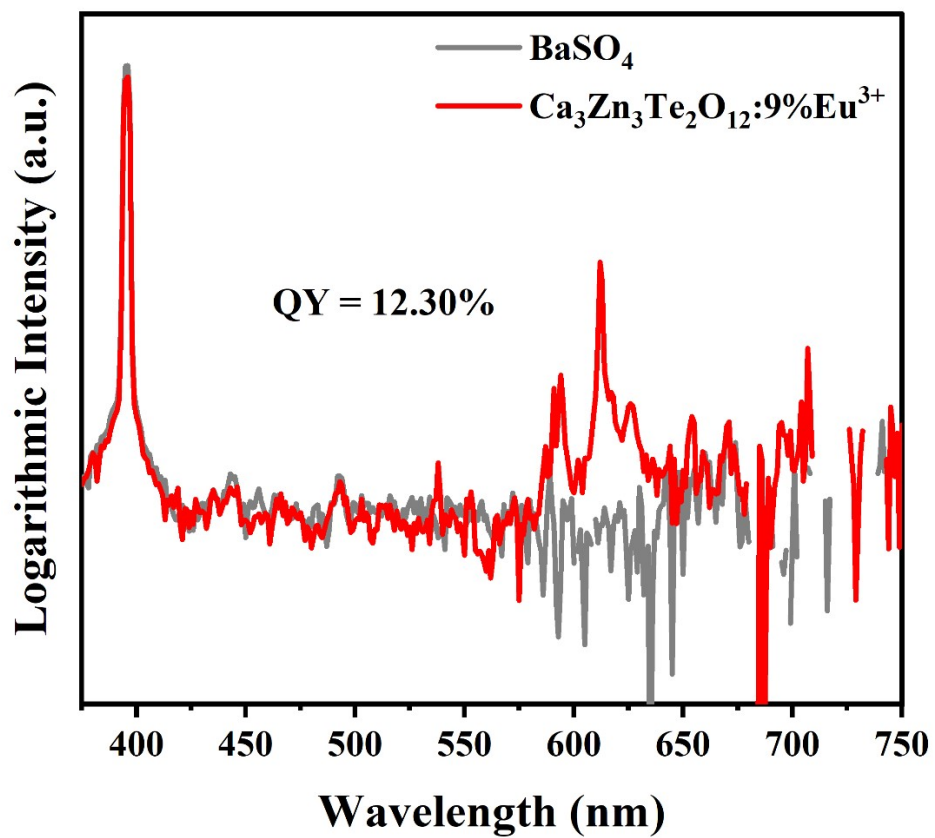

Figure S1. Quantum yield of Ca<sub>3</sub>Zn<sub>3</sub>Te<sub>2</sub>O<sub>12</sub>:9%Eu<sup>3+</sup> phosphor.

**Table 1** The refined crystallographic parameters of  $\text{Ca}_3\text{Zn}_3\text{Te}_2\text{O}_{12}$  host and  $\text{Ca}_3\text{Zn}_3\text{Te}_2\text{O}_{12}:9\%\text{Eu}^{3+}$  phosphor.

| Compound           | $\text{Ca}_3\text{Zn}_3\text{Te}_2\text{O}_{12}$ host | $\text{Ca}_3\text{Zn}_3\text{Te}_2\text{O}_{12}:9\%\text{Eu}^{3+}$ |
|--------------------|-------------------------------------------------------|--------------------------------------------------------------------|
| Crystal structure  | Cubic                                                 | Cubic                                                              |
| Space group        | <i>Ia-3d</i>                                          | <i>Ia-3d</i>                                                       |
| Lattice parameters | $a = b = c = 12.5696 \text{ \AA}$                     | $a = b = c = 12.5664 \text{ \AA}$                                  |
|                    | $\alpha = \beta = \gamma = 90^\circ$                  | $\alpha = \beta = \gamma = 90^\circ$                               |
| Unit cell volume   | $V = 1985.93 \text{ \AA}^3$                           | $V = 1984.39 \text{ \AA}^3$                                        |
| $R_p$              | 13.62%                                                | 14.36%                                                             |
| $R_{wp}$           | 8.94%                                                 | 9.12%                                                              |
| $\chi^2$           | 0.91                                                  | 0.96                                                               |

**Table 2** Elemental compositions of  $\text{Ca}_3\text{Zn}_3\text{Te}_2\text{O}_{12}:9\%\text{Eu}^{3+}$  phosphor.

| Element | Theoretical ratio (%) | Atomic ratio (%) |
|---------|-----------------------|------------------|
| Ca      | 13.65                 | 11.42            |
| Zn      | 15                    | 17.94            |
| Te      | 10                    | 9.49             |
| O       | 60                    | 58.97            |
| Eu      | 1.35                  | 2.18             |

**Table 3** CIE chromaticity coordinates, CCT and color purity of  $\text{Ca}_3\text{Zn}_3\text{Te}_2\text{O}_{12}:x\text{Eu}^{3+}$  ( $x = 3\%, 6\%, 9\%, 12\%, 15\%$ ) phosphors.

| $\text{Ca}_3\text{Zn}_3\text{Te}_2\text{O}_{12}:x\text{Eu}^{3+}$ | CIE(x,y)      | CCT(K) | Color purity(%) |
|------------------------------------------------------------------|---------------|--------|-----------------|
| $x = 3\%$                                                        | (0.658,0.341) | 2575   | 96.56           |
| $x = 6\%$                                                        | (0.658,0.341) | 2577   | 96.56           |
| $x = 9\%$                                                        | (0.659,0.341) | 2593   | 96.70           |
| $x = 12\%$                                                       | (0.659,0.340) | 2620   | 96.88           |
| $x = 15\%$                                                       | (0.659,0.340) | 2622   | 96.88           |

**Table 4** CIE chromaticity coordinates, CRI and CCT of  $\text{Ca}_3\text{Zn}_3\text{Te}_2\text{O}_{12}:9\%\text{Eu}^{3+}$  phosphor driven by different bias currents (20 - 320 mA).

| Current (mA) | CIE(x, y)      | CRI  | CCT (K) |
|--------------|----------------|------|---------|
| 20           | (0.353, 0.367) | 80.2 | 4785    |
| 40           | (0.353, 0.368) | 79.4 | 4784    |
| 60           | (0.354, 0.371) | 78.8 | 4765    |
| 80           | (0.354, 0.372) | 78.3 | 4774    |
| 100          | (0.354, 0.374) | 77.9 | 4789    |
| 120          | (0.354, 0.374) | 77.8 | 4784    |
| 160          | (0.352, 0.373) | 77.4 | 4851    |
| 200          | (0.351, 0.373) | 77.4 | 4875    |
| 240          | (0.349, 0.369) | 79.6 | 4923    |
| 280          | (0.347, 0.369) | 77.1 | 4999    |
| 320          | (0.344, 0.365) | 80   | 5076    |
